# Supplementary material for: Dopamine Receptor Subtypes Differentially Regulate Autophagy
Source: MDPI journal article supplement (doi:10.3390/ijms19051540), 2018-05-22
Supplement: s1 [file s1]

Supplementary Materials

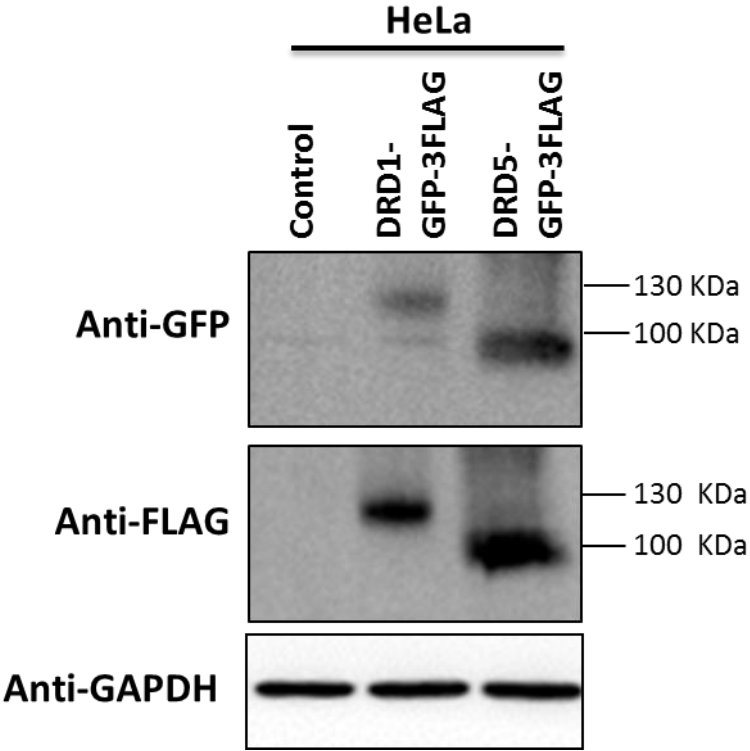

**Figure S1.** DRD1/DRD5-GFP-3Flag stably expressing HeLa cells were established with MSCV infection and verified by Western blot. Both anti-GFP and anti-Flag antibodies were used to detect the full length of DRD1/DRD5-GFP-3Flag. Representative Western blots are shown.

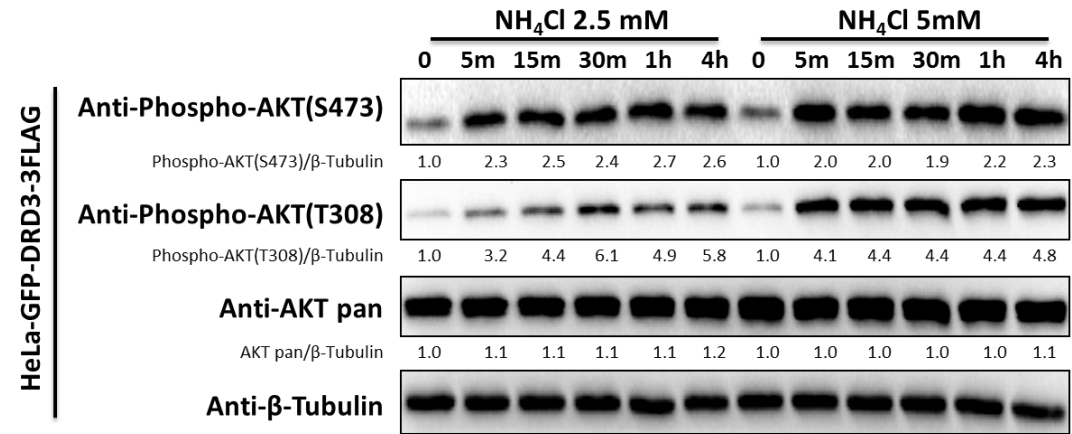

**Figure S2.** Ammonia increased AKT phosphorylation at Ser-473 and Thr-308. 2.5 and 5 mM ammonia treatment for different time was shown to increase ATK activity in GFP-DRD3-3Flag stably expressing HeLa cells. Representative Western blots are shown. Densitometric analysis was performed and quantification results were labeled below the corresponding blots.

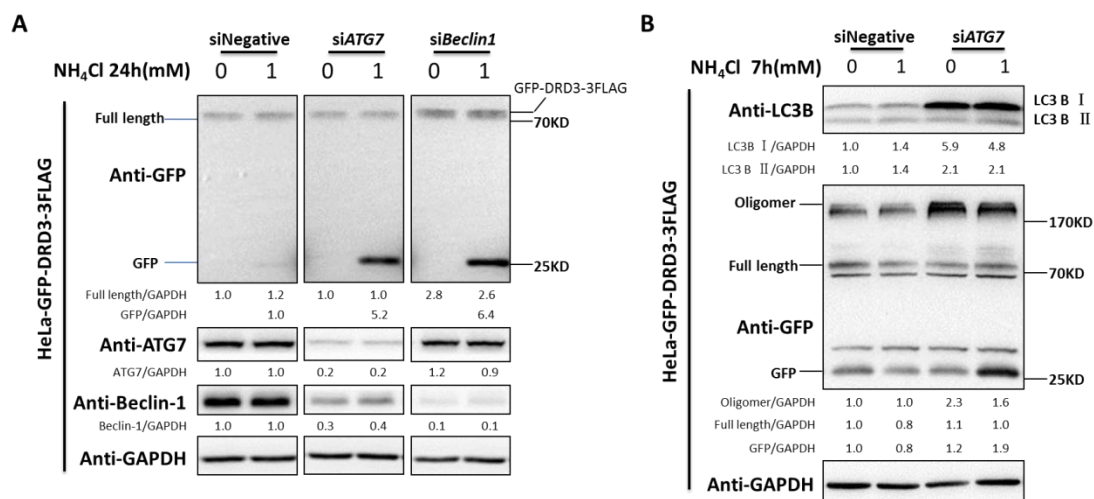

**Figure S3.** Autophagy machinery perturbation sensitizes the GFP fragment accumulation from GFP-DRD3 but does not affect GFP-DRD3-3Flag full length protein level. **(A-B)** ATG7 and/or Beclin-1 knockdown was performed in GFP-DRD3-3Flag stably expressing HeLa cells. Then the cells were treated with 1 mM ammonia for 24 h or 7 h and lysed for Western blot analysis. Representative Western blots are shown. Densitometric analysis was performed and quantification results were labeled below the corresponding blots.
